# Supplementary material for: An ionic liquid doped electrochemical copolymer coating of indole and 3-methylthiophene for the solid-phase microextraction of polycyclic aromatic hydrocarbons
Source: Royal Society of Chemistry journal article supplement (doi:10.1039/c7ra02372c), 2017-01-01
Supplement: c7ra02372c1.pdf [file c7ra02372c1.pdf]

# An ionic liquid doped electrochemical copolymer coating of indole and 3-methylthiophene for the solid-phase microextraction of polycyclic aromatic hydrocarbons

Xiafei Guo, Aiziguli·mulati, Mian Wu, Jie Zhang, Liu Yang, Faqiong Zhao, Baizhao Zeng \*

Key laboratory of Analytical Chemistry for Biology and Medicine (Ministry of Education),  
College of Chemistry and Molecular Science, Wuhan University, Wuhan, Hubei 430072, PR  
China

## Supplementary Information

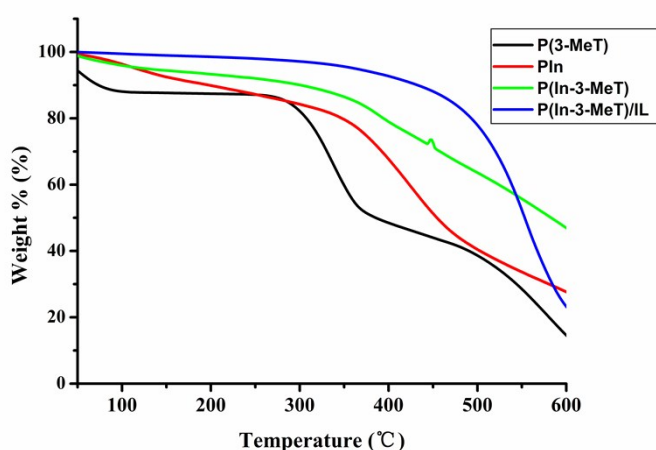

Fig. S1. TGA curves of P(In-3-MeT)/IL, P(In-3-MeT), P(3-MeT) and PIn coating in nitrogen gas atmosphere. Heating rate: 10 °C min<sup>-1</sup>.

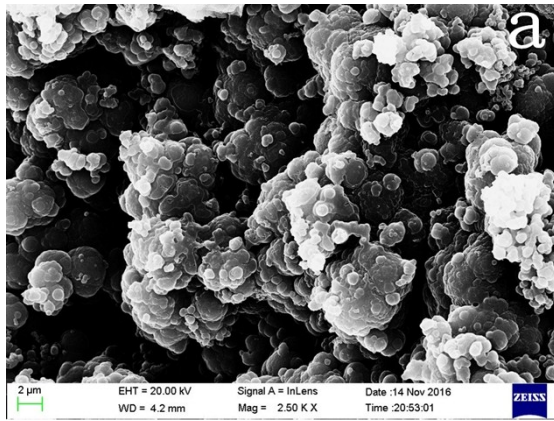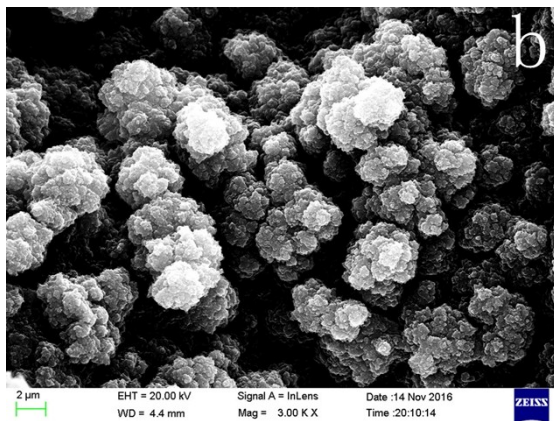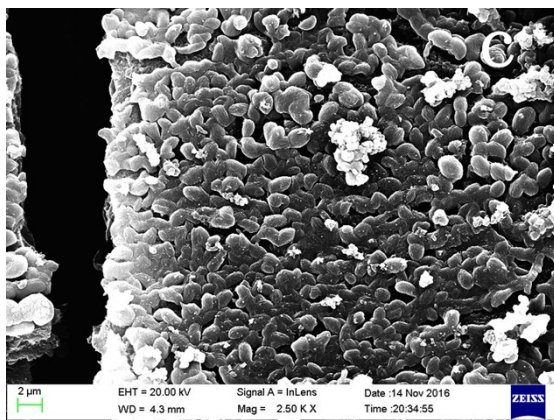

Fig. S2. SEM images of P(In-3-MeT) (a), P(3-MeT) (b), PIn (c).

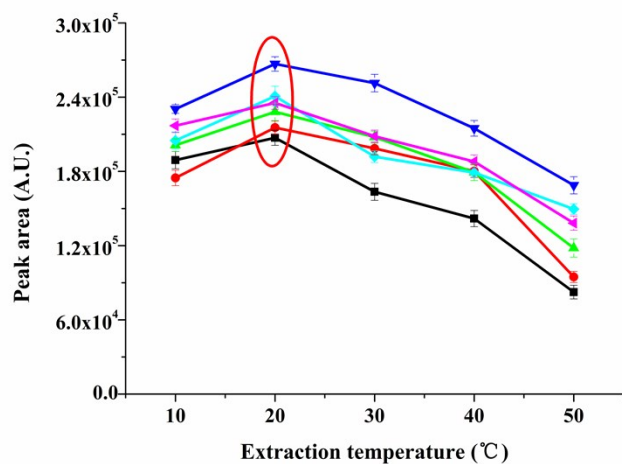

Fig. S3a. Influence of extraction temperature on extraction efficiency of P(In-3-MeT)/IL fiber for the PAHs. Concentrations of the PAHs,  $5 \mu\text{g L}^{-1}$ ; extraction time, 30 min; NaCl concentration,  $0.35 \text{ g mL}^{-1}$ ; stirring rate, 500 rpm; desorption time, 3 min; desorption temperature,  $250 \text{ }^\circ\text{C}$ . Error bars show the standard deviation ( $n = 3$ ).

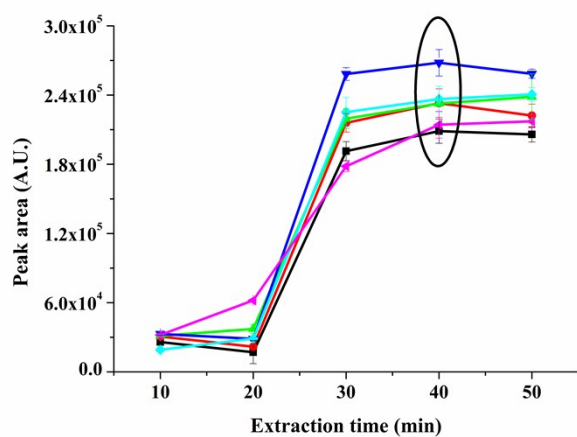

Fig. S3b. Influence of extraction time on extraction efficiency of P(In-3-MeT)/IL fiber for the PAHs. Other conditions as in Fig. S3a. Error bars show the standard deviation ( $n = 3$ ).

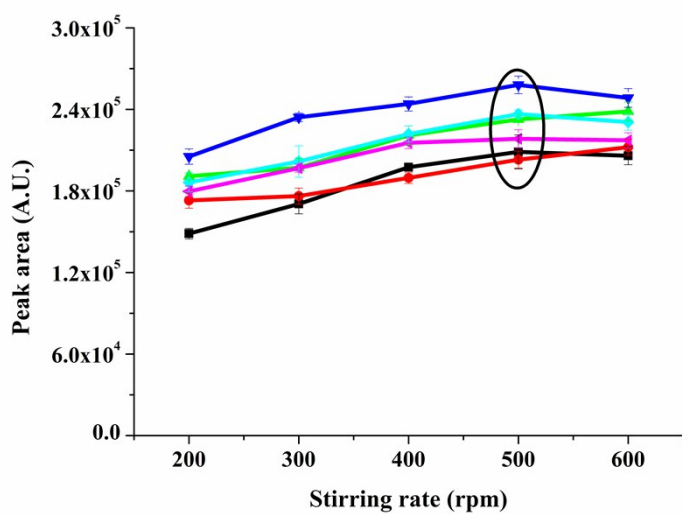

Fig. S3c. Influence of stirring rate on extraction efficiency of P(In-3-MeT)/IL fiber for the PAHs. Other conditions as in Fig. S3a. Error bars show the standard deviation (n = 3).

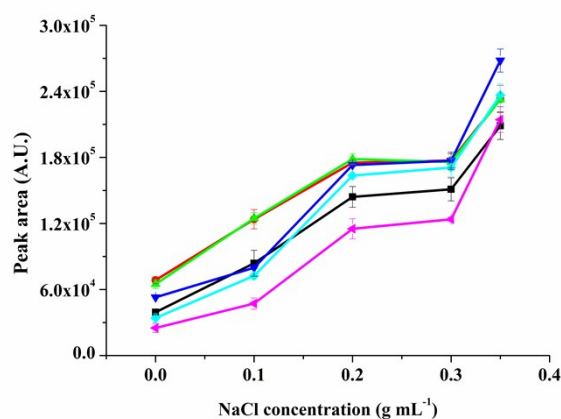

Fig. S3d. Influence of salt concentration on extraction efficiency of P(In-3-MeT)/IL fiber for the PAHs. Other conditions as in Fig. S3a. Error bars show the standard deviation (n = 3).

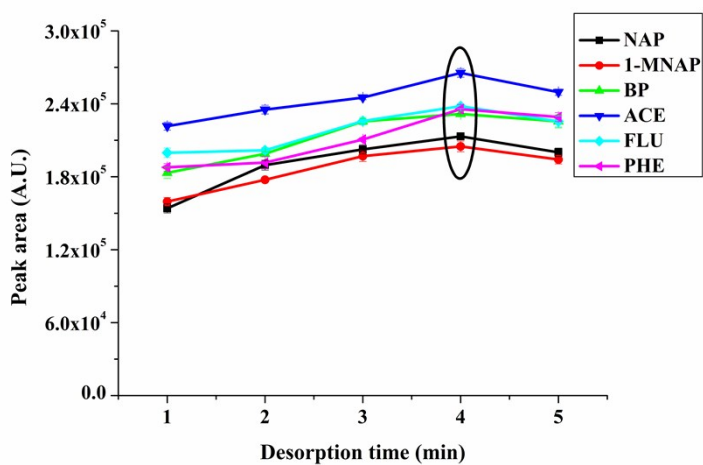

Fig. S3e. Influence of desorption temperature and time on GC peak areas of the PAHs after SPME

with the P(In-3-MeT)/IL fiber. Other conditions as in Fig. S3a. Error bars show the standard deviation ( $n = 3$ ).

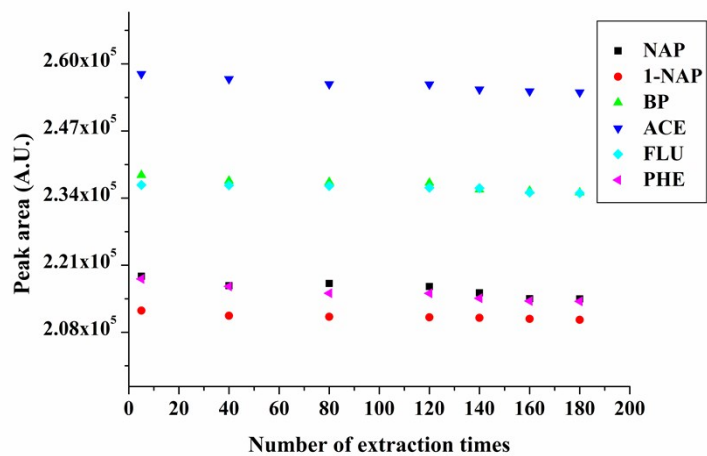

Fig. S4. Variation of extraction efficiency with the extraction times used. Concentration of PAHs:  $5 \mu\text{g L}^{-1}$ ; extraction temperature:  $20 \text{ }^\circ\text{C}$ ; extraction time: 40 min; stirring rate: 500 rpm; NaCl concentration:  $0.35 \text{ g mL}^{-1}$ ; desorption time: 4 min; desorption temperature:  $250 \text{ }^\circ\text{C}$ .
